# Supplementary material for: Virus-like Silica Nanoparticles Improve Permeability of Macromolecules across the Blood–Brain Barrier In Vitro
Source: MDPI journal article supplement (doi:10.3390/pharmaceutics15092239), 2023-08-30
Supplement: s1 [file s1]

## Supporting Information

# Virus-like Silica Nanoparticles Improve Permeability of Macromolecules across the Blood–Brain Barrier In Vitro

Yuran Feng, Yuxue Cao, Zhi Qu, Taskeen Iqbal Janjua \* and Amirali Popat \*

School of Pharmacy, The University of Queensland, Brisbane, QLD 4102, Australia

\* Correspondence: t.janjua@uq.edu.au (T.I.J.); a.popat@uq.edu.au (A.P.)

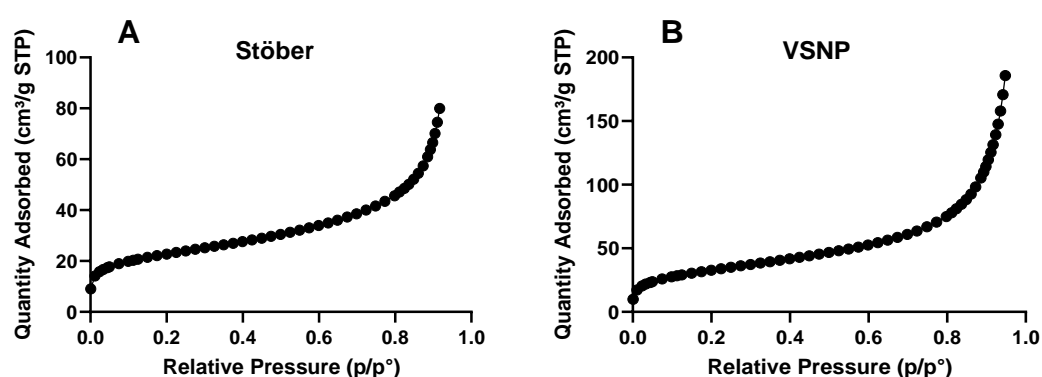

Figure S1. Nitrogen adsorption–desorption isotherms of (A) Stöber and (B) VSNP.

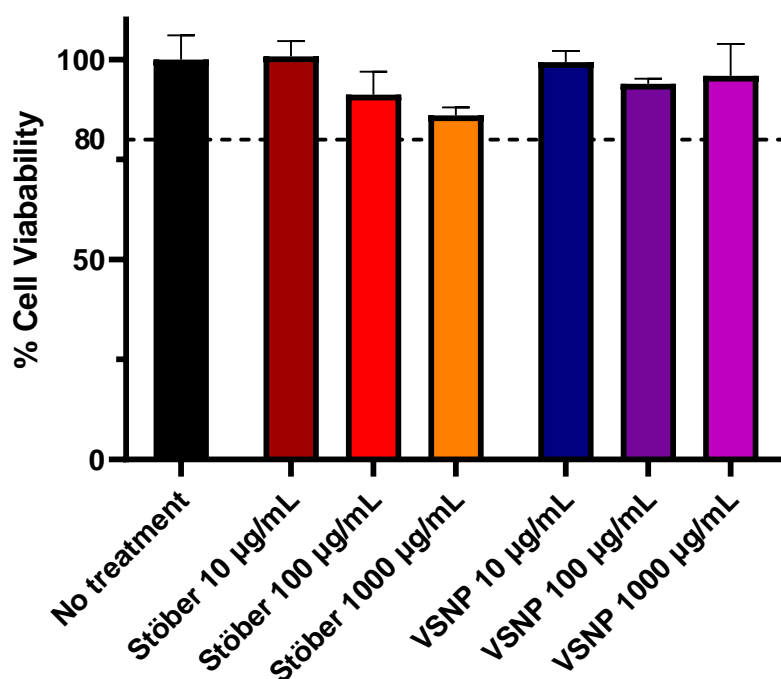

Figure S2. Cell viability was tested in hCMEC/D3 brain endothelial cell line. Cell treated with either Stöber and VSNP for 4 hours (concentration from 10 $\mu$ g/mL to 1000 $\mu$ g/mL) showed no significant toxicity and cell viability was above 80% at all concentrations. AlamarBlue assay was performed to study the cytotoxicity, n=5 for treatment groups and n=10 for no treatment group.

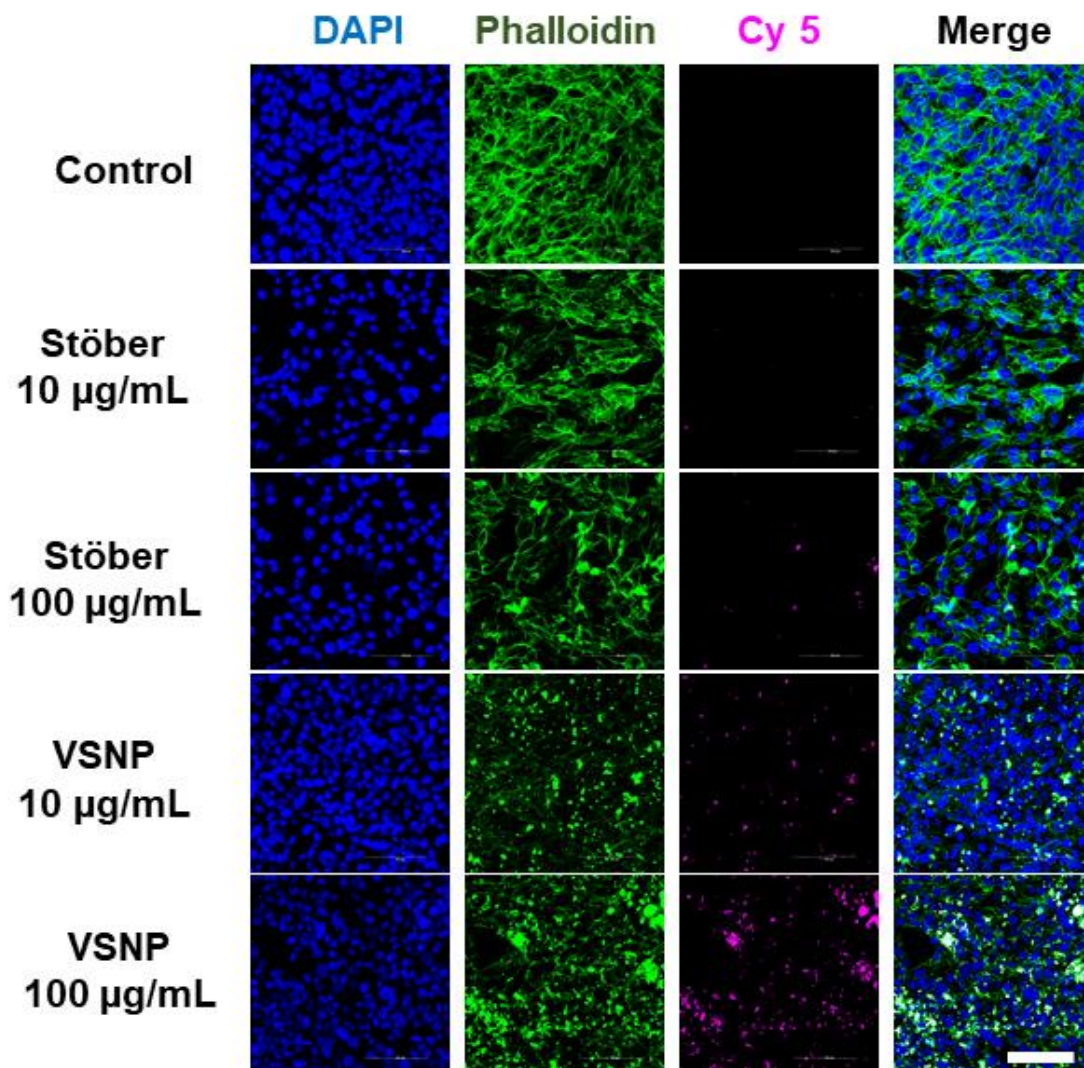

Figure S3. Uptake of Stöber and VSNP nanoparticles into human brain endothelial cells hCMEC/D3 analysed by confocal microscopy. Scale bar, 100  $\mu$ m. Blue DAPI staining nuclei, green Phalloidin staining cytoskeleton and pink Cy5 labelled silica nanoparticles.
